# Supplementary material
Source: MDPI journal article supplement (https://www.mdpi.com/search?q=molecules-26-01243)
Supplement: s001 [file molecules-26-01243-s001.pdf]

## Supplementary Materials

### **Broadband Visible Light-Absorbing [70]Fullerene-BODIPY-Triphenylamine Triad: Synthesis and Application as Heavy Atom-Free Organic Triplet Photosensitizer for Photooxidation**

San-E Zhu,<sup>\*1</sup> Jian-Hui Zhang,<sup>1</sup> Yu Gong,<sup>1</sup> Li-Feng Dou,<sup>1</sup> Li-Hua Mao,<sup>1</sup> Hong-Dian Lu,<sup>1</sup> Chun-Xiang Wei,<sup>1</sup> Hong Chen,<sup>1</sup> Xue-Fei Wang<sup>\*2</sup> and Wei Yang<sup>\*1</sup>

<sup>1</sup>School of Energy, Materials and Chemical Engineering, Hefei University, Hefei, Anhui 230601, China.

<sup>2</sup>School of Chemistry and Chemical Engineering, University of Chinese Academy of Sciences, Beijing 100049, China.

*E-mail address:* zhuse@hfu.edu.cn (S.-E Z.); [wangxf@ucas.ac.cn](mailto:wangxf@ucas.ac.cn) (X.-F. W.); [weyang@ustc.edu.cn](mailto:weyang@ustc.edu.cn) (W. Yang).

#### **Contents**

|                                                                  |              |
|------------------------------------------------------------------|--------------|
| <b>1. The spectral response of DHN with MB as the sensitizer</b> | <b>S2</b>    |
| <b>2. The photostability of C<sub>70</sub>-B-T</b>               | <b>S2</b>    |
| <b>3. High resolution mass spectra</b>                           | <b>S2-7</b>  |
| <b>4. <sup>1</sup>H NMR and <sup>13</sup>C NMR spectra</b>       | <b>S7-15</b> |

## 1. The spectral response of DHN with MB as the sensitizer.

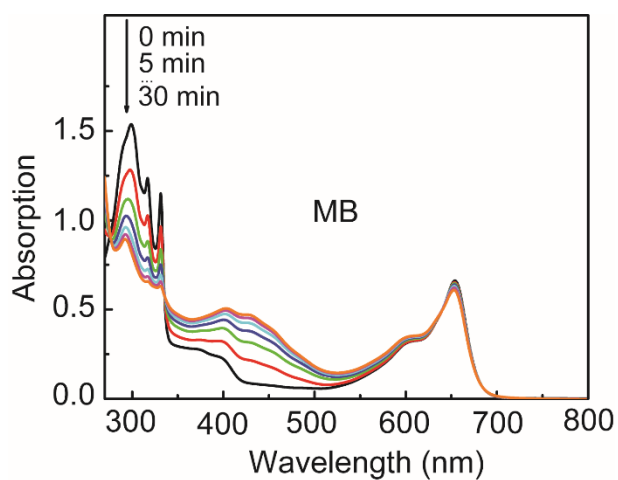

**Figure S1.** Absorption spectral change for the photooxidation of DHN using **MB** as the sensitizer.  $c[\text{MB}] = 1.0 \times 10^{-5} \text{ mol L}^{-1}$ ,  $c[\text{DHN}] = 1.0 \times 10^{-4} \text{ mol L}^{-1}$ . In  $\text{CH}_2\text{Cl}_2$ -MeOH (9/1, v/v).

## 2. The photostability of $\text{C}_{70}$ -B-T.

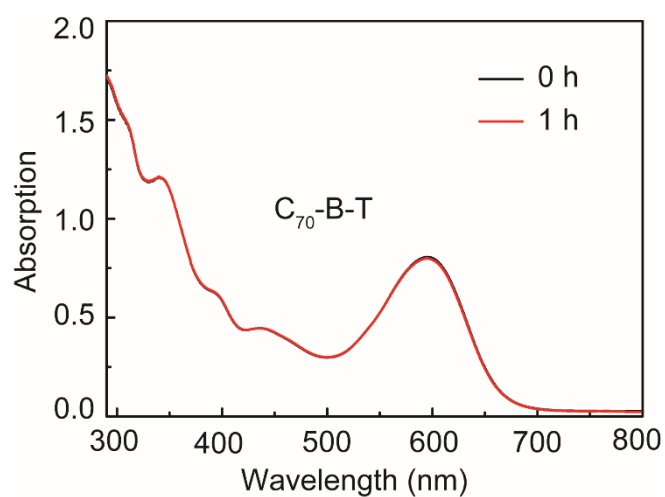

**Figure S2.** The stability of  $\text{C}_{70}$ -B-T.  $c = 1.0 \times 10^{-5} \text{ mol L}^{-1}$  in  $\text{CH}_2\text{Cl}_2$ -MeOH (9/1, v/v). After being exposed to light for 1 h, no bleaching is observed.

## 3. High resolution mass spectra

Comment 1

Comment 2

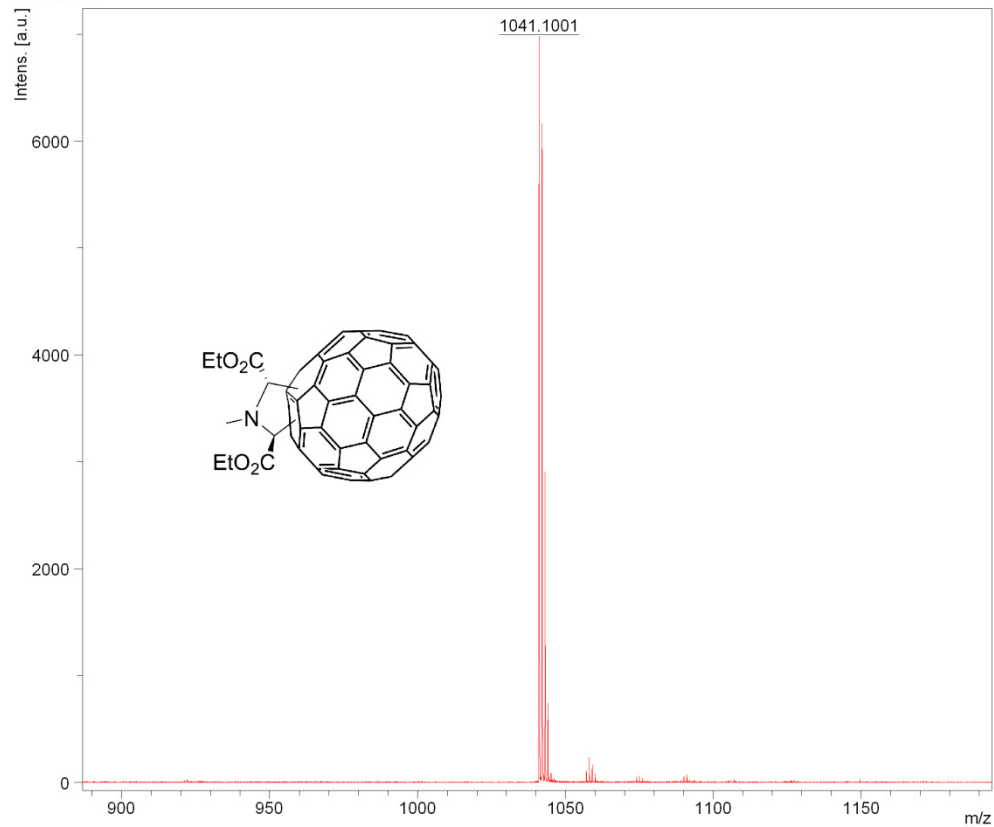

**Acquisition Parameter**

Date of acquisition 2020-11-30T19:07:21.003+08:00  
Acquisition method name D:\Methods\flexControlMethods\gc-RN\_0-1200\_Da.par  
Acquisition operation mode Reflector  
Voltage polarity NEG  
Number of shots 500  
Name of spectrum used for calibration  
Calibration reference list used sample

**Instrument Info**

User BDAL@CN  
Instrument FLEX-PC  
Instrument type ultraflexTOF/TOF

**Figure S3.** The high resolution mass spectrum (HRMS) of C<sub>70</sub>-1.

Comment 1

Comment 2

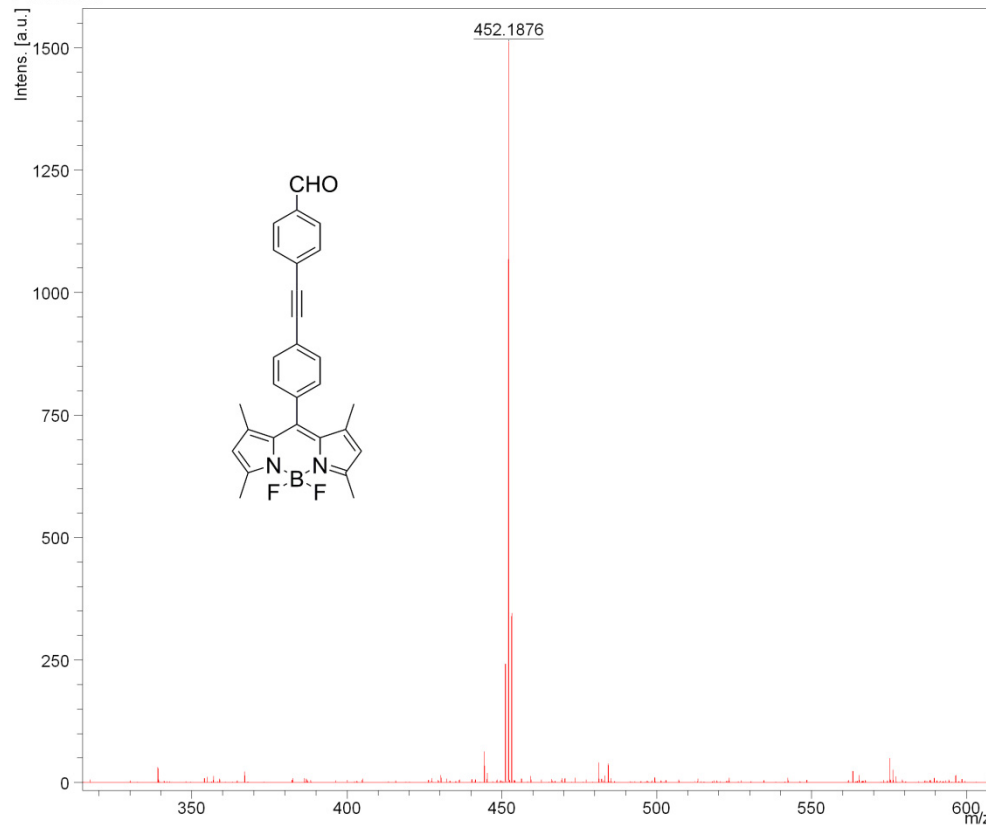

**Acquisition Parameter**

Date of acquisition 2020-12-07T15:36:14.445+08:00  
Acquisition method name D:\Methods\flexControlMethods\gc-RP\_100-1500\_Da.par  
Acquisition operation mode Reflector  
Voltage polarity POS  
Number of shots 500  
Name of spectrum used for calibration  
Calibration reference list used sample

**Instrument Info**

User BDAL@CN  
Instrument FLEX-PC  
Instrument type ultraflexTOF/TOF

**Figure S4.** The high resolution mass spectrum (HRMS) of **5**.

Comment 1

Comment 2

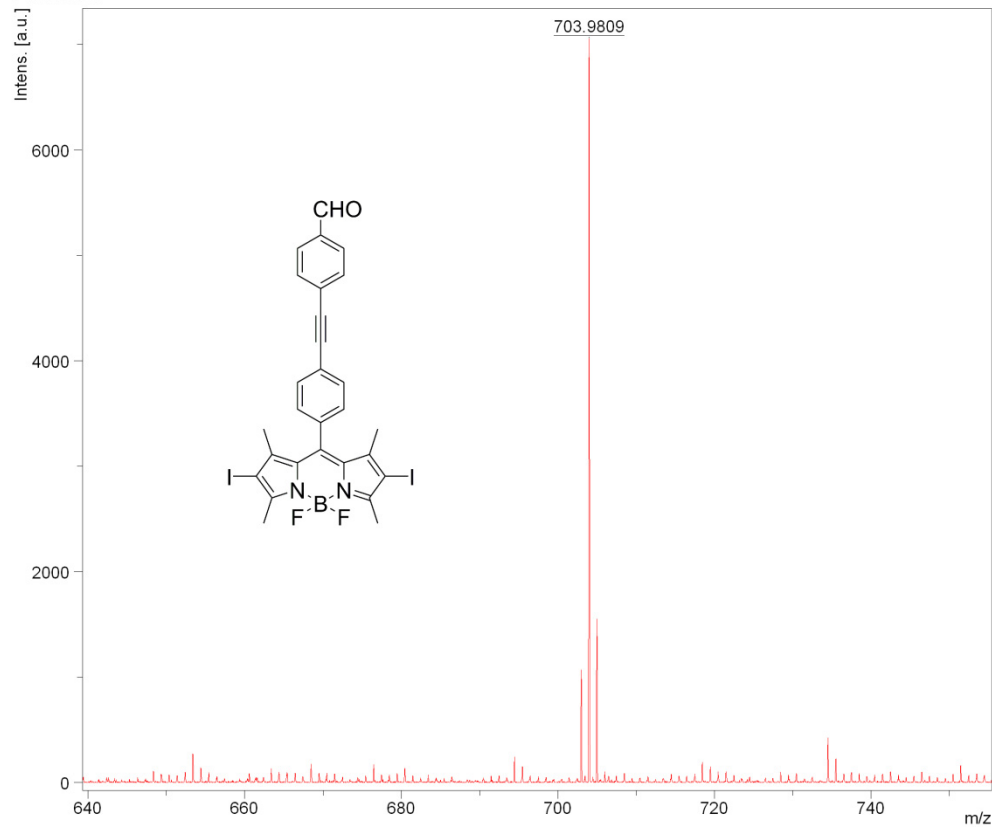

**Acquisition Parameter**

Date of acquisition 2020-12-07T15:38:11.898+08:00  
Acquisition method name D:\Methods\flexControlMethods\gc-RP\_100-1500\_Da.par  
Acquisition operation mode Reflector  
Voltage polarity POS  
Number of shots 500  
Name of spectrum used for calibration  
Calibration reference list used sample

**Instrument Info**

User BDAL@CN  
Instrument FLEX-PC  
Instrument type ultraflexTOF/TOF

**Figure S5.** The high resolution mass spectrum (HRMS) of 6.

Comment 1

Comment 2

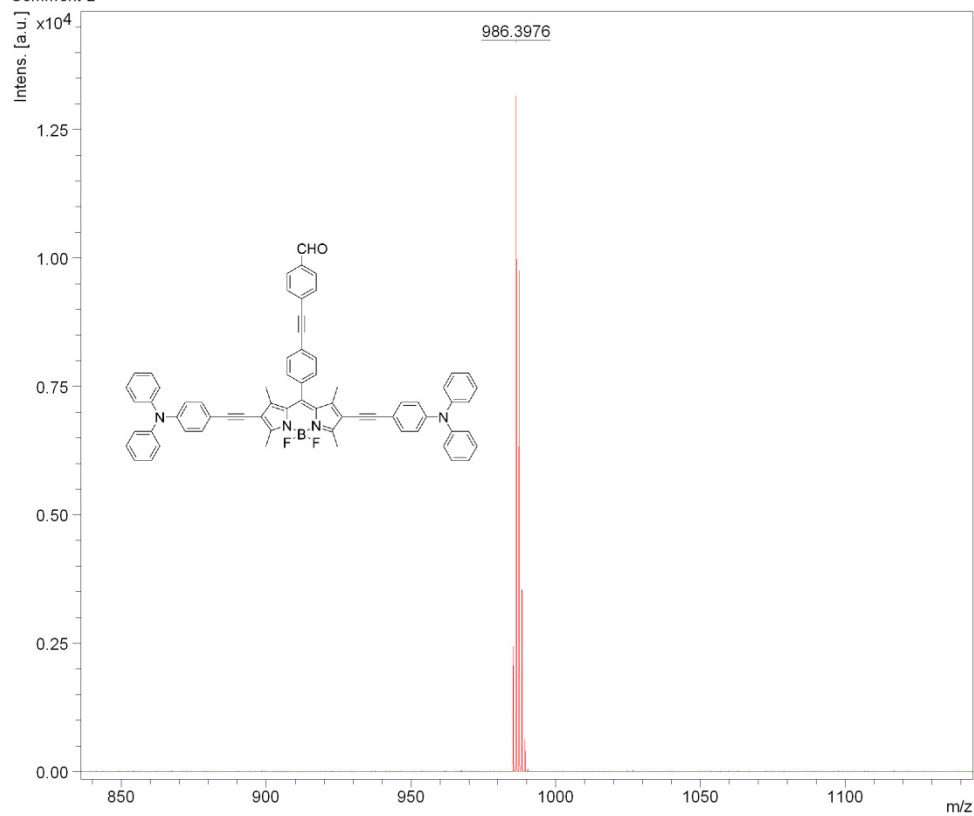

**Acquisition Parameter**

Date of acquisition 2020-11-30T19:19:45.159+08:00  
Acquisition method name D:\Methods\flexControlMethods\gc-RP\_100-1500\_Da.par  
Acquisition operation mode Reflector  
Voltage polarity POS  
Number of shots 500  
Name of spectrum used for calibration  
Calibration reference list used sample

**Instrument Info**

User BDAL@CN  
Instrument FLEX-PC  
Instrument type ultraflexTOF/TOF

**Figure S6.** The high resolution mass spectrum (HRMS) of B-T.

Comment 1

Comment 2

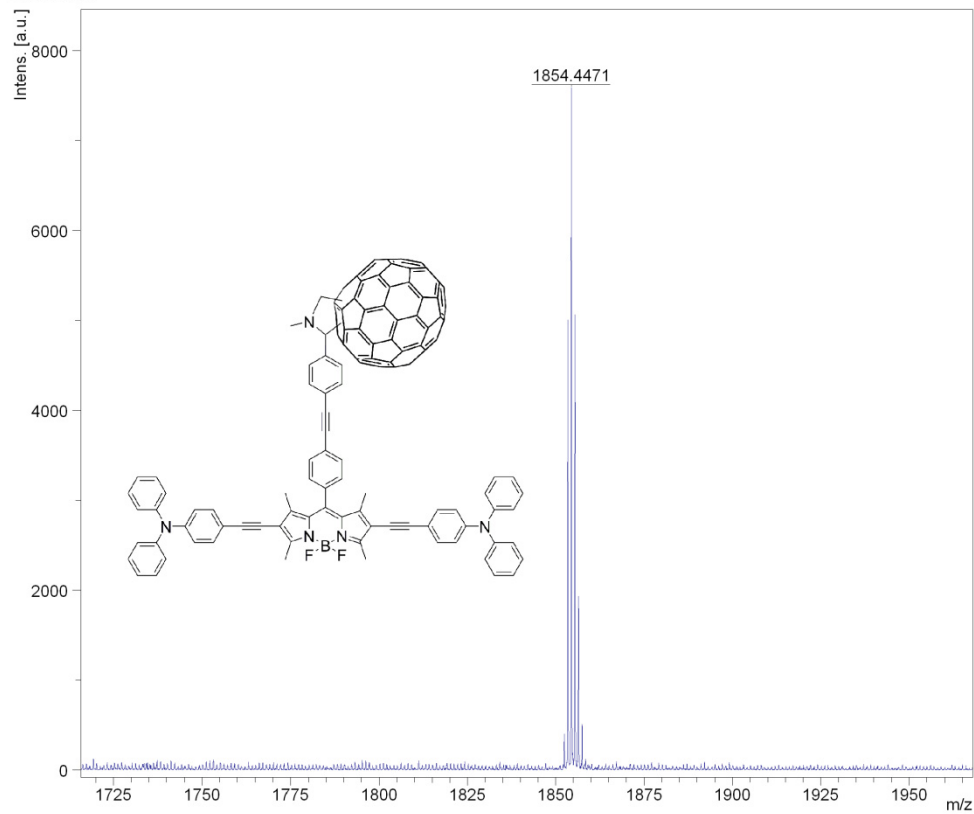

**Acquisition Parameter**

Date of acquisition 2020-12-16T20:47:47.423+08:00  
Acquisition method name D:\Methods\flexControlMethods\gc-RP\_100-1500\_Da.par  
Acquisition operation mode Reflector  
Voltage polarity POS  
Number of shots 500  
Name of spectrum used for calibration  
Calibration reference list used sample

**Instrument Info**

User BDAL@CN  
Instrument FLEX-PC  
Instrument type ultraflexTOF/TOF

Figure S7. The high resolution mass spectrum (HRMS) of C<sub>70</sub>-B-T.

## 4. <sup>1</sup>H NMR and <sup>13</sup>C NMR spectra

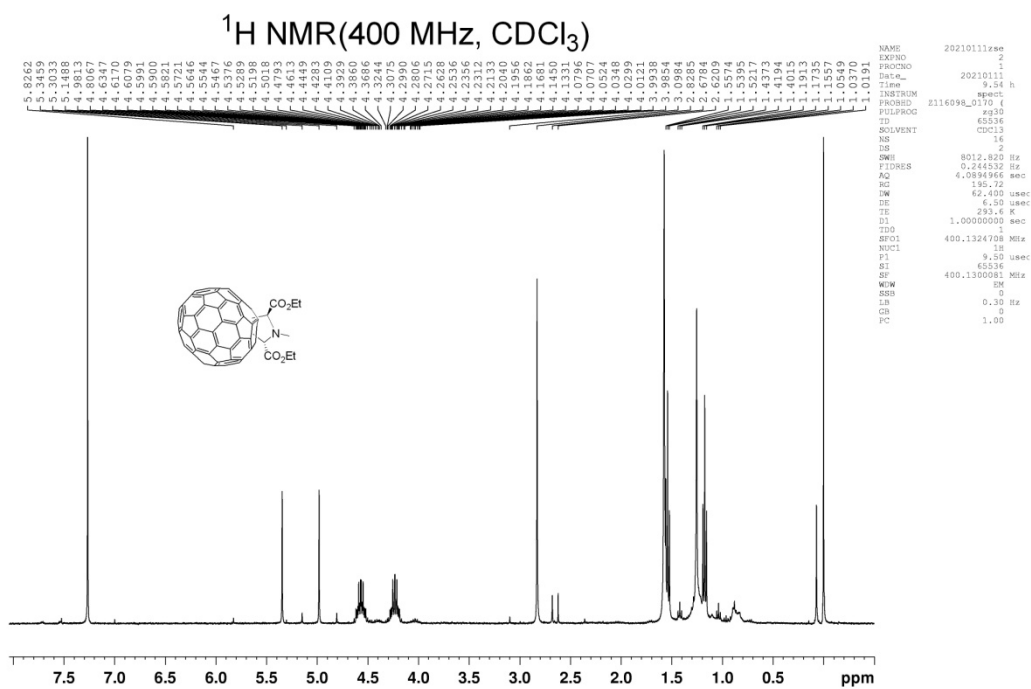

**Figure S8.** <sup>1</sup>H NMR of C<sub>70</sub>-1 in CDCl<sub>3</sub> (400 MHz).

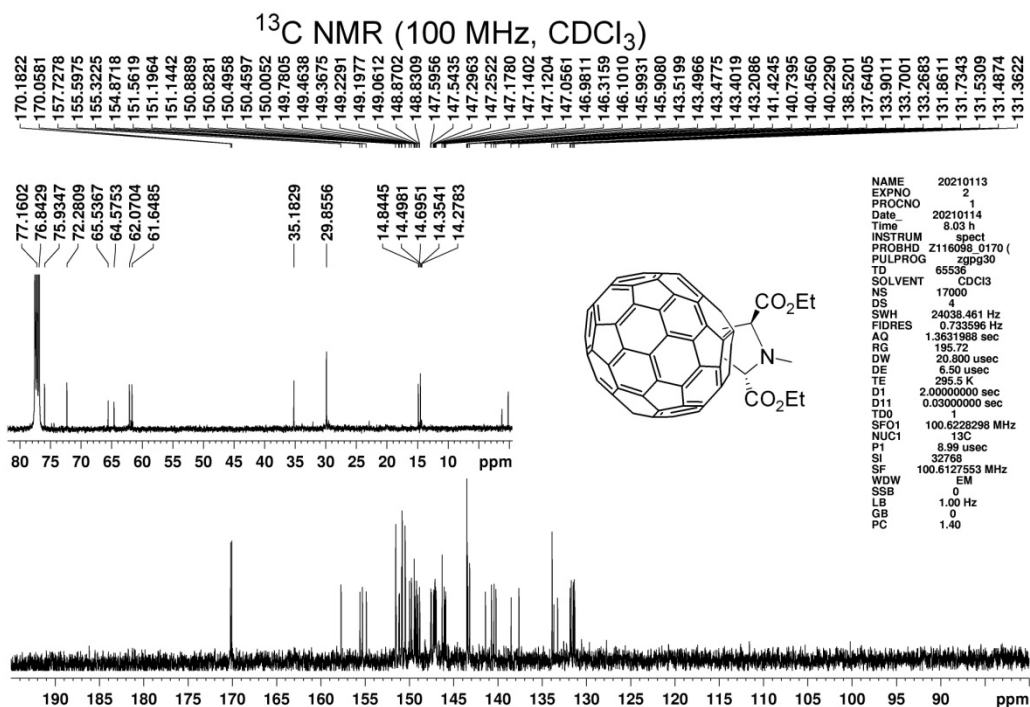

**Figure S9.** <sup>13</sup>C NMR of C<sub>70</sub>-1 in CDCl<sub>3</sub> (100 MHz).



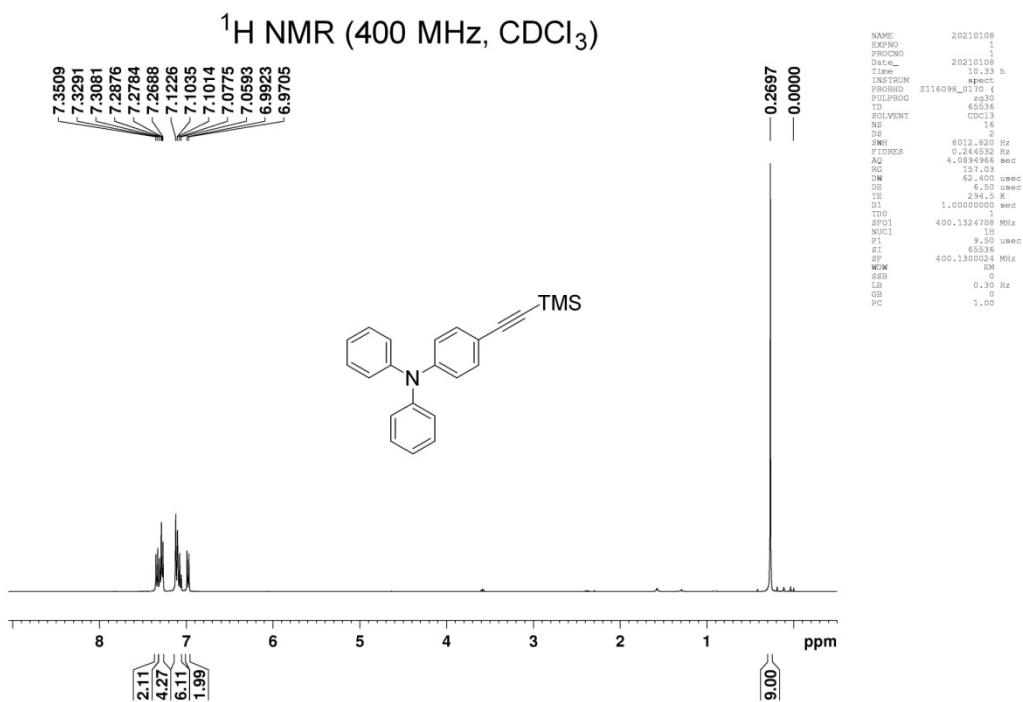

Figure S10. <sup>1</sup>H NMR of **2** in CDCl<sub>3</sub> (400 MHz).

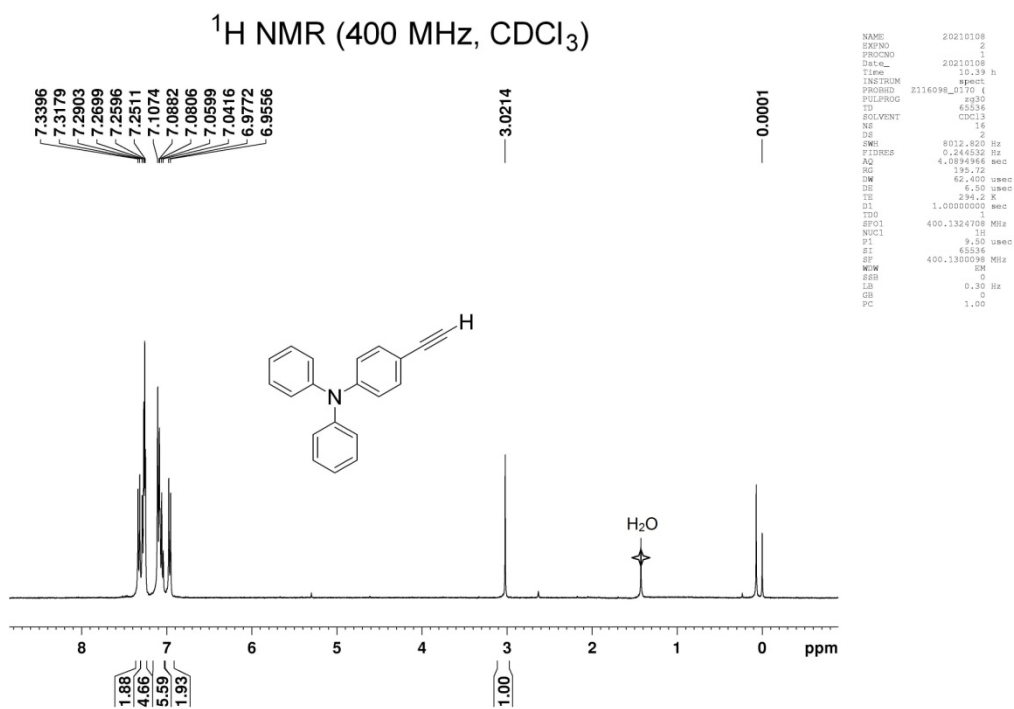

Figure S11. <sup>1</sup>H NMR of **3** in CDCl<sub>3</sub> (400 MHz).

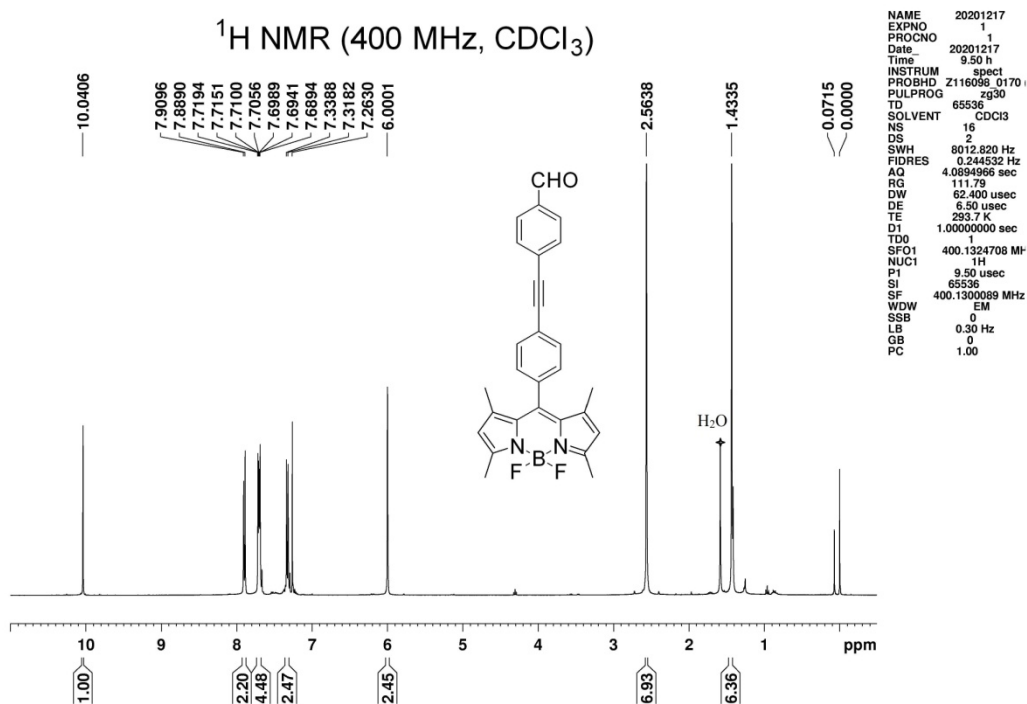

Figure S12. <sup>1</sup>H NMR of **5** in CDCl<sub>3</sub> (400 MHz).

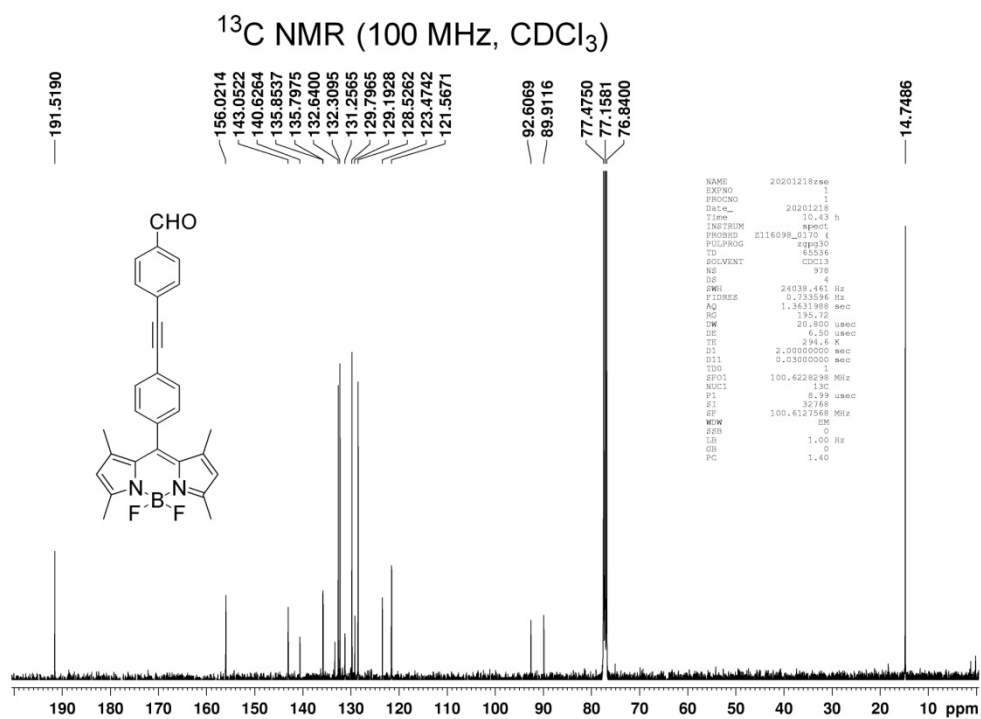

Figure S13. <sup>13</sup>C NMR of **5** in CDCl<sub>3</sub> (100 MHz).

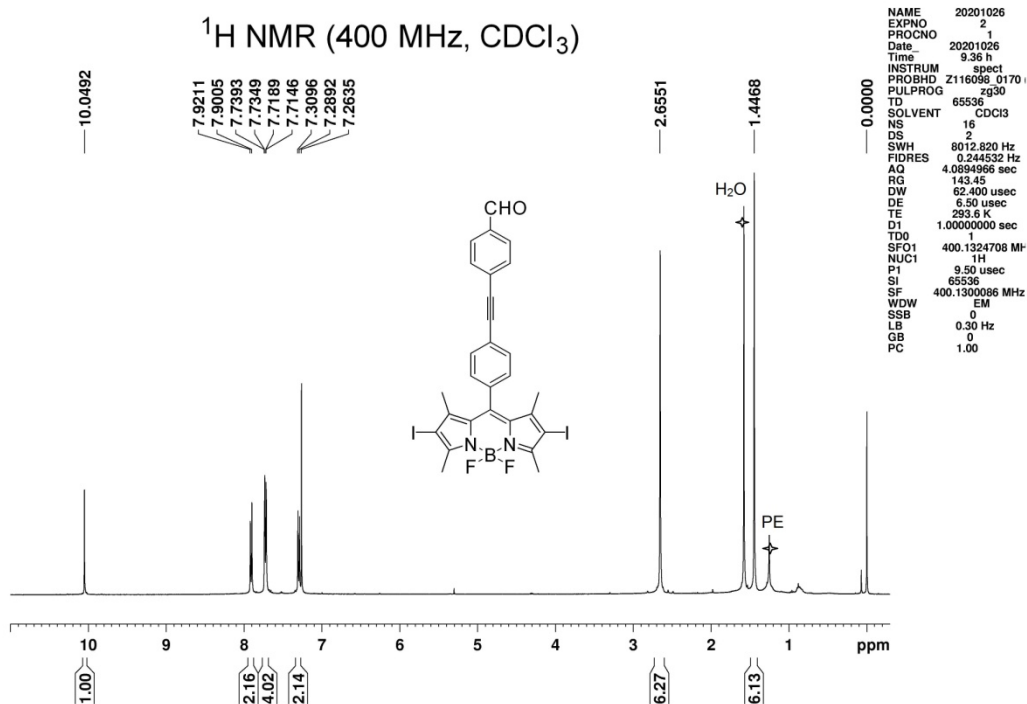

**Figure S14.** <sup>1</sup>H NMR of **6** in CDCl<sub>3</sub> (400 MHz).

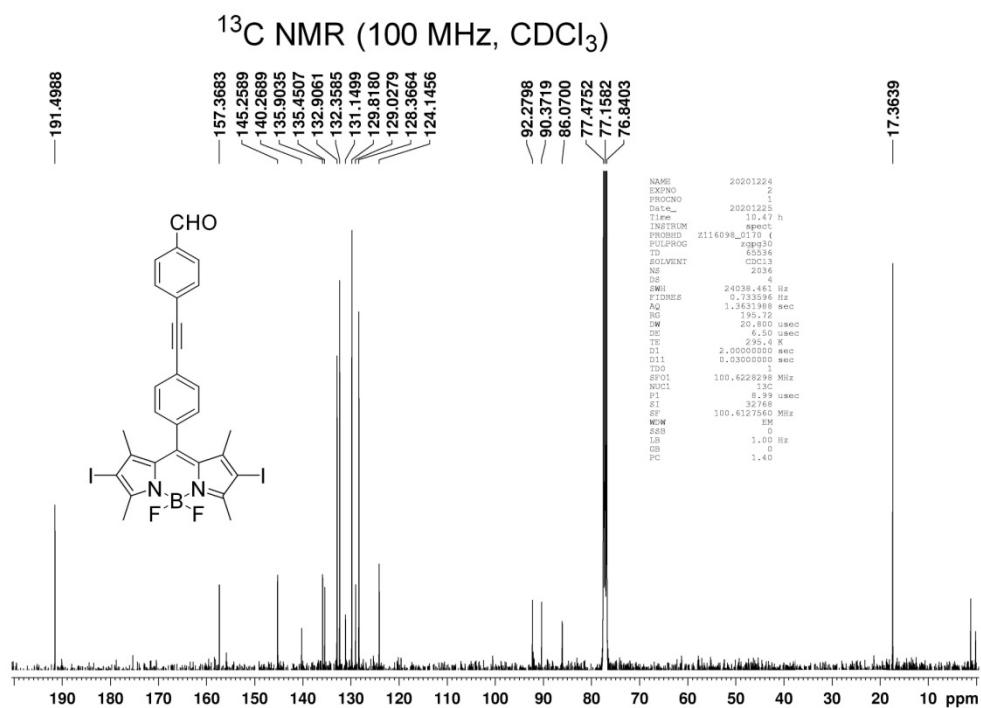

**Figure S15.** <sup>13</sup>C NMR of **6** in CDCl<sub>3</sub> (100 MHz).

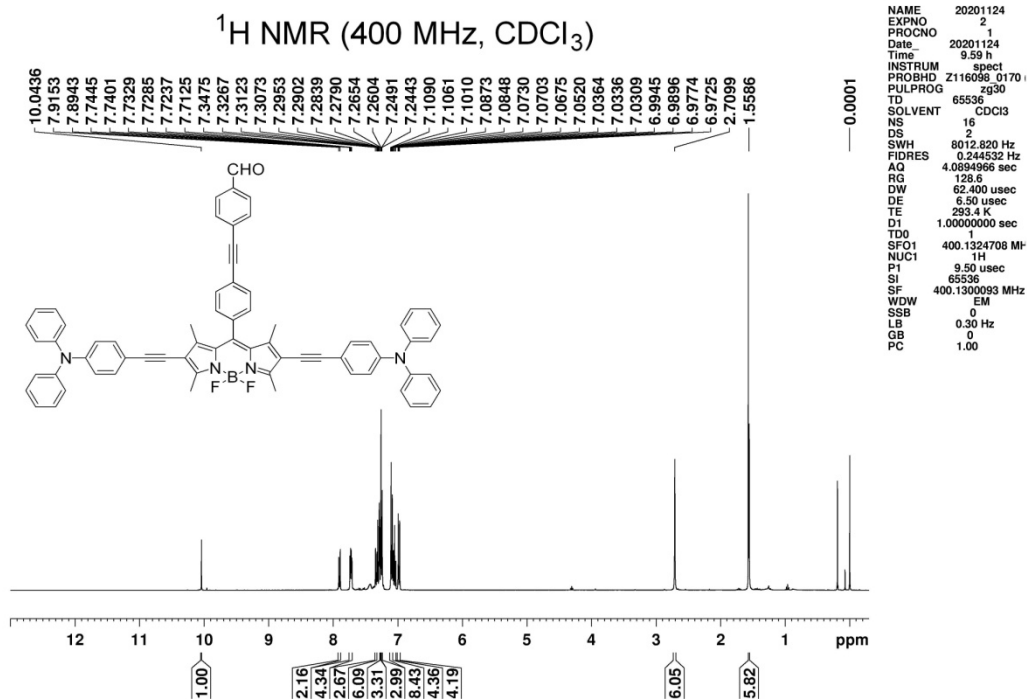

```

NAME      20201124
EXPNO    2
PROCNO   1
Date_    20201124
Time     9:59 h
INSTRUM  spect
PROBHD   Z116098_0170 (
PULPROG  zg30
TD        65536
SOLVENT  CDCl3
NS        16
DS        2
SWH       8012.820 Hz
FIDRES   0.244532 Hz
AQ        4.0684966 sec
RG        128.8
DW        62.400 usec
DE        6.50 usec
TE        293.4 K
D1        1.00000000 sec
TD0       400.1324708 MHz
SFO1      400.1324708 MHz
NUC1      1H
P1        9.50 usec
SI        65536
SF        400.1300093 MHz
WDW       EM
SSB       0
LB        0.30 Hz
GB        0
PC        1.00
  
```

Figure S16. <sup>1</sup>H NMR of B-T in CDCl<sub>3</sub> (400 MHz).

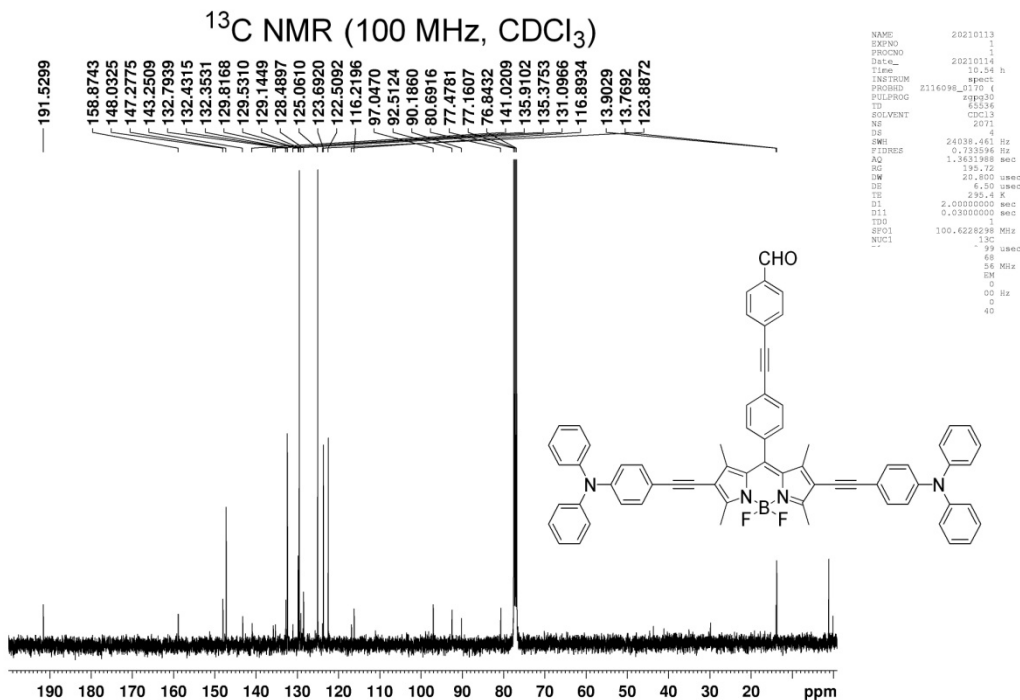

```

NAME      20210113
EXPNO    1
PROCNO   1
Date_    20210114
Time     10:54 h
INSTRUM  spect
PROBHD   Z116098_0170 (
PULPROG  zgpg30
TD        65536
SOLVENT  CDCl3
NS        2071
DS        4
SWH       24038.461 Hz
FIDRES   0.733596 Hz
AQ        1.3631968 sec
RG        195.72
DW        20.800 usec
DE        6.50 usec
TE        295.4 K
D1        2.00000000 sec
D11       0.03000000 sec
TD0       1
SFO1      100.6228298 MHz
NUC1      13C
P1        99 usec
SI        65
SF        56 MHz
WDW       EM
SSB       0
LB        0.00 Hz
GB        0
PC        40
  
```

Figure S17. <sup>13</sup>C NMR of B-T in CDCl<sub>3</sub> (100 MHz).

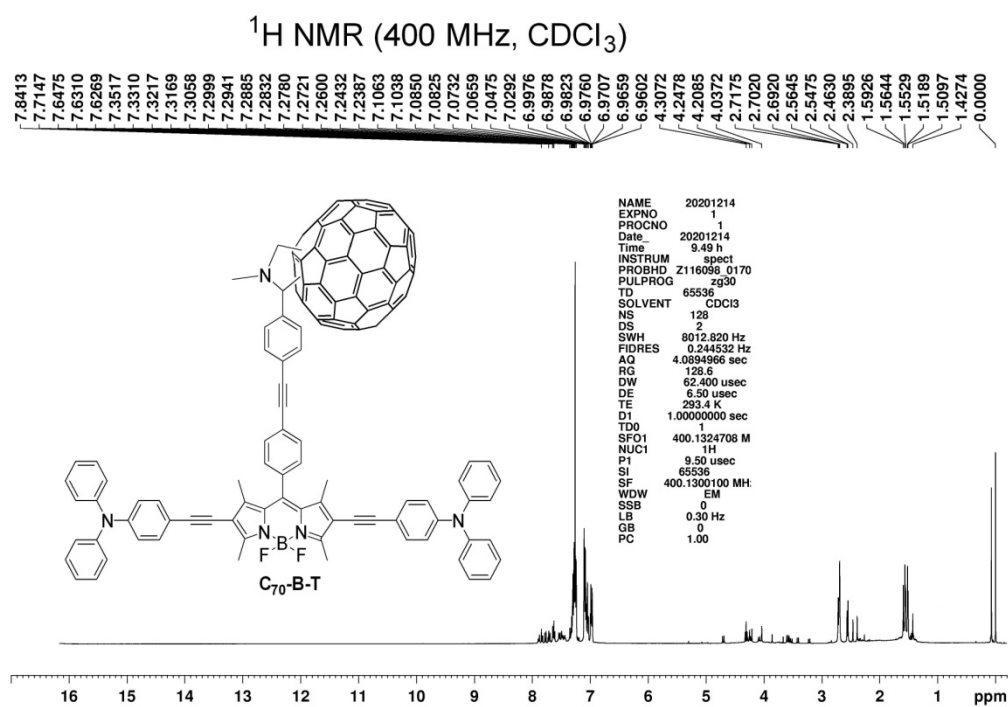

Figure S18. <sup>1</sup>H NMR of C<sub>70</sub>-B-T in CDCl<sub>3</sub> (400 MHz).

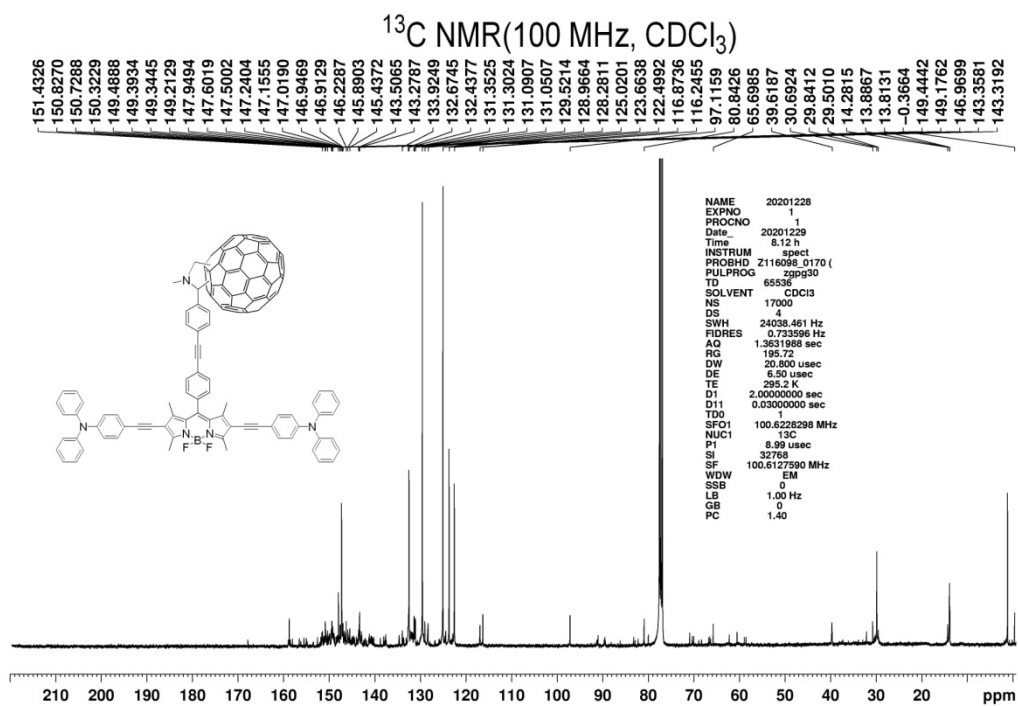

Figure S19. <sup>13</sup>C NMR of C<sub>70</sub>-B-T in CDCl<sub>3</sub> (100 MHz).

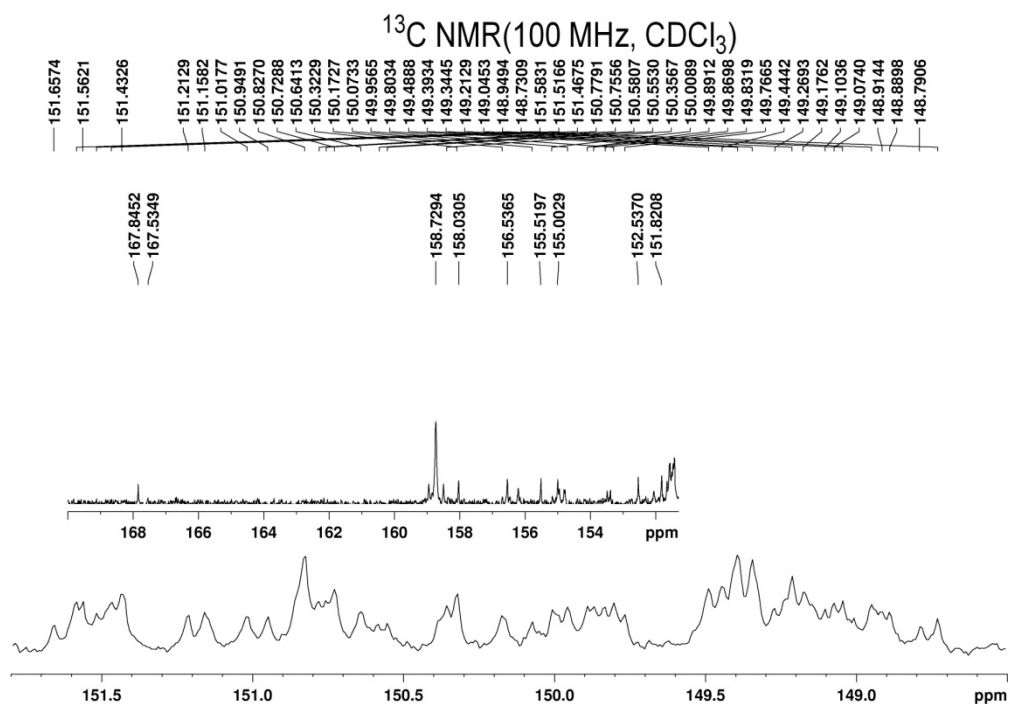

Figure S20. Expansion of the  $^{13}\text{C}$  NMR of  $\text{C}_{70}\text{-B-T}$ .

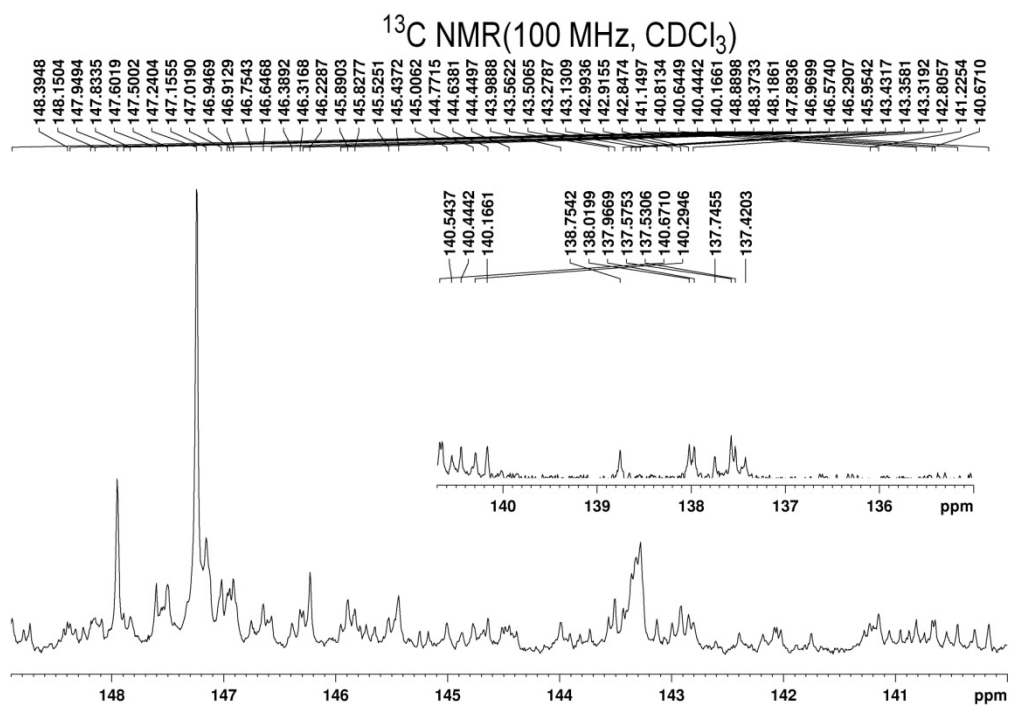

Figure S21. Expansion of the  $^{13}\text{C}$  NMR of  $\text{C}_{70}\text{-B-T}$ .

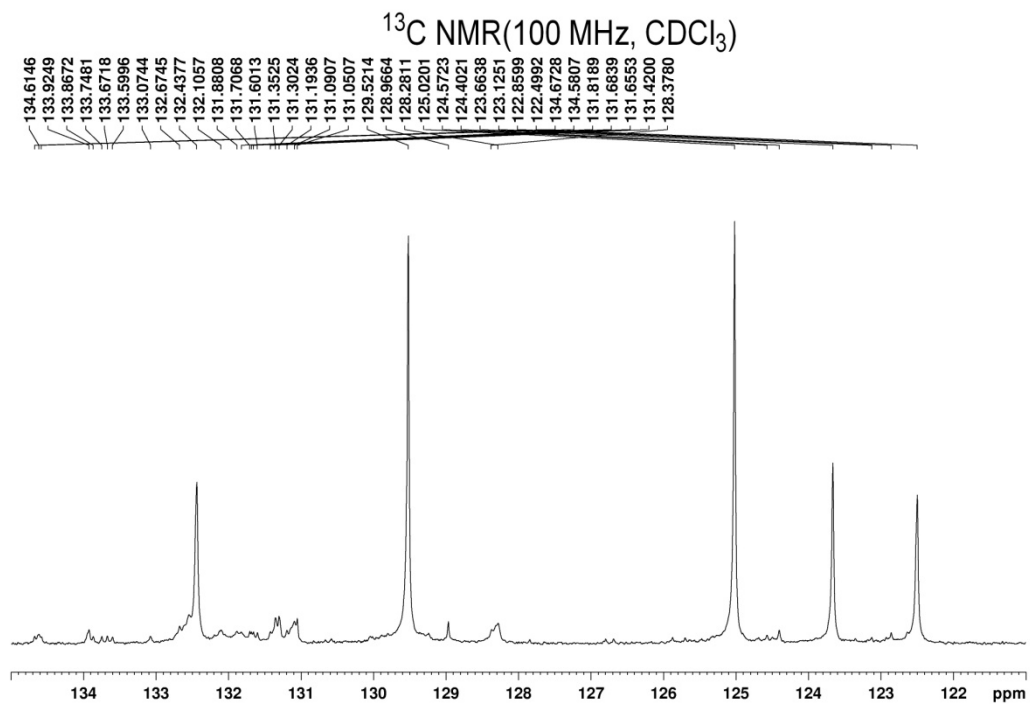

Figure S22. Expansion of the <sup>13</sup>C NMR of C<sub>70</sub>-B-T.

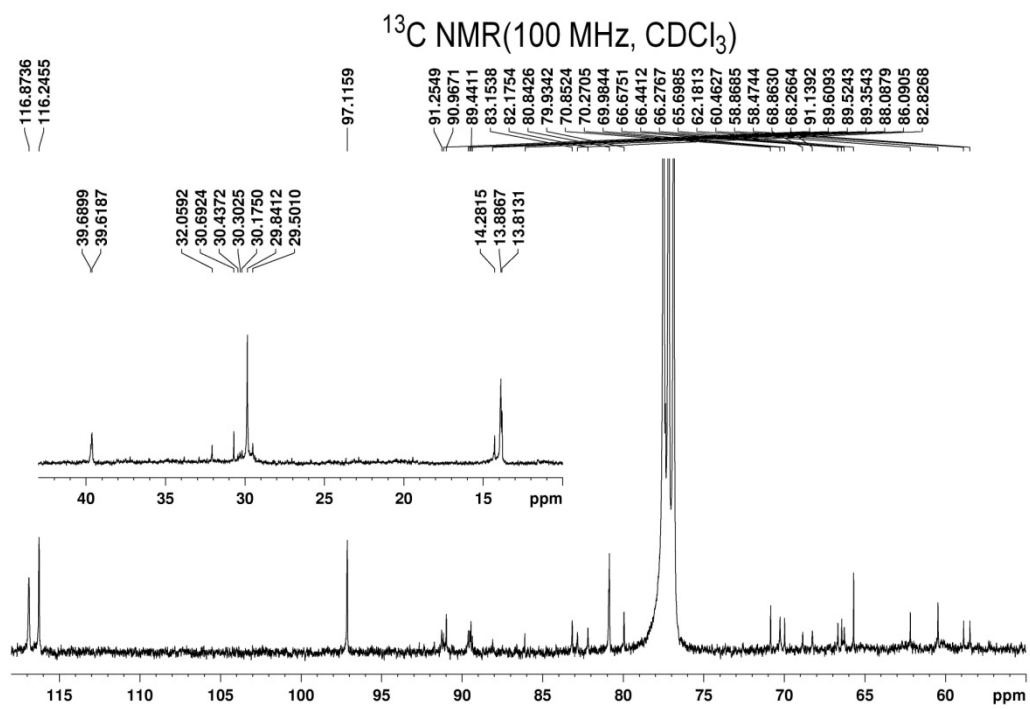

Figure S23. Expansion of the <sup>13</sup>C NMR of C<sub>70</sub>-B-T.
